# Supplementary material for: High-Throughput Analysis from Complex Matrices: Acoustic Ejection Mass Spectrometry from Phase-Separated Fluid Samples
Source: MDPI journal article supplement (doi:10.3390/metabo11110789), 2021-11-18
Supplement: s1 [file s1]

## Supporting Information

# High-Throughput Analysis from Complex Matrices: Acoustic Ejection Mass Spectrometry from Phase- Separated Fluid Samples

Yuzhu Guo <sup>1</sup>, Michael Forbush <sup>2</sup>, Thomas R. Covey <sup>1</sup>, Lucien Ghislain <sup>2</sup> and Chang Liu <sup>1,\*</sup>

<sup>1</sup> SCIEX, 71 Four Valley Drive, Concord, ON L4K 4V8, Canada; yuzhu.guo@sciex.com (Y.G.); tom.covey@sciex.com (T.R.C.)

<sup>2</sup> Beckman Coulter Life Sciences, 170 Rose Orchard Way, San Jose, CA 95134, USA; mforbush@beckman.com (M.F.); lghislain@beckman.com (L.G.)

\* Correspondence: chang.liu@sciex.com

This file includes:

- Supplemental Figures S1 and S2

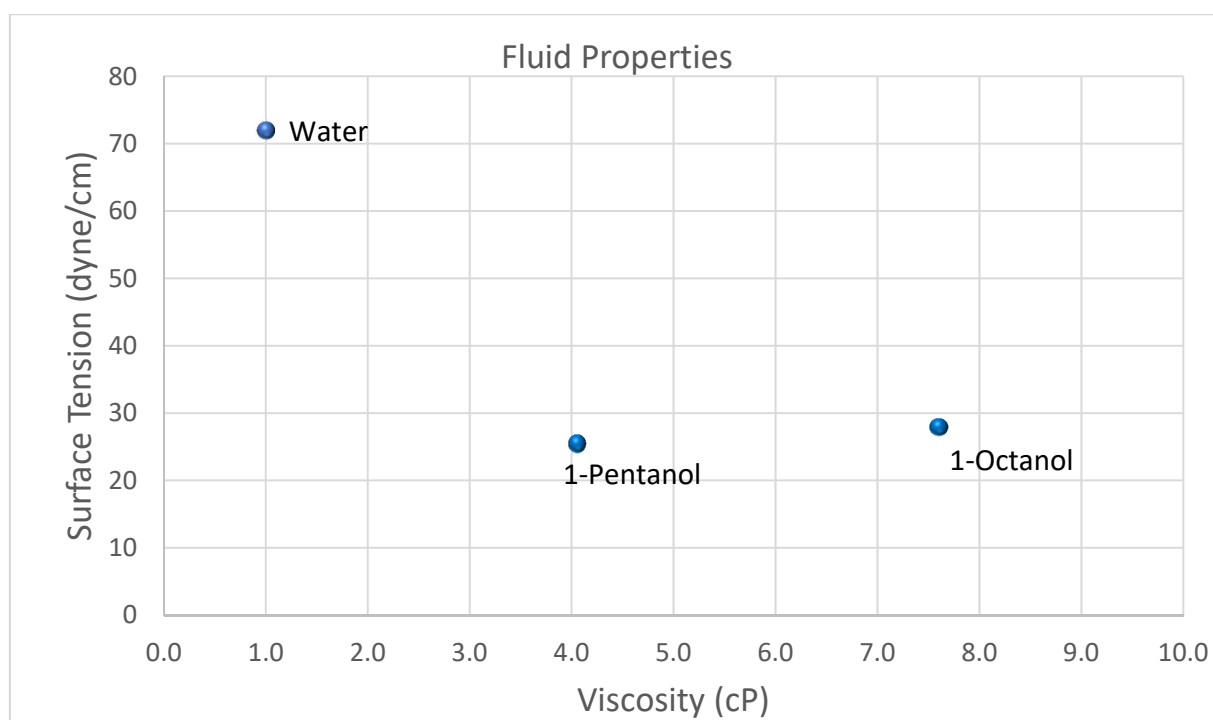

**Figure S1.** Fluid properties of water, 1-pentanol and 1-octanol.

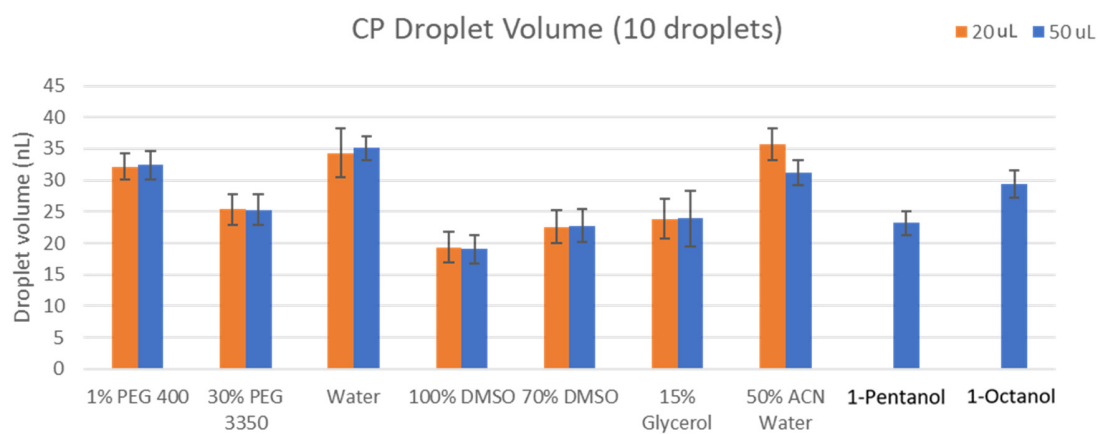

**Figure S2.** The measured volume of ten acoustically ejected droplets from different solvent systems.
